# Supplementary material for: Multi-omics reveals the anticancer mechanism of asparagus saponin-asparanin A on endometrial cancer Ishikawa cells
Source: Royal Society of Chemistry journal article supplement (doi:10.1039/d0fo02265a), 2020-12-10

## Supplemental Figures.

**Fig. S1** Venn diagram and PPI network of DEGs involved in apoptosis and autophagy subsets. (A) Venn diagram showing the DEGs involved in apoptosis (32 DEGs, red) and autophagy (36 DEGs, blue) sets. (B) PPI network reveals the 59 DEGs (a total of apoptosis and autophagy DEGs) functional modules.

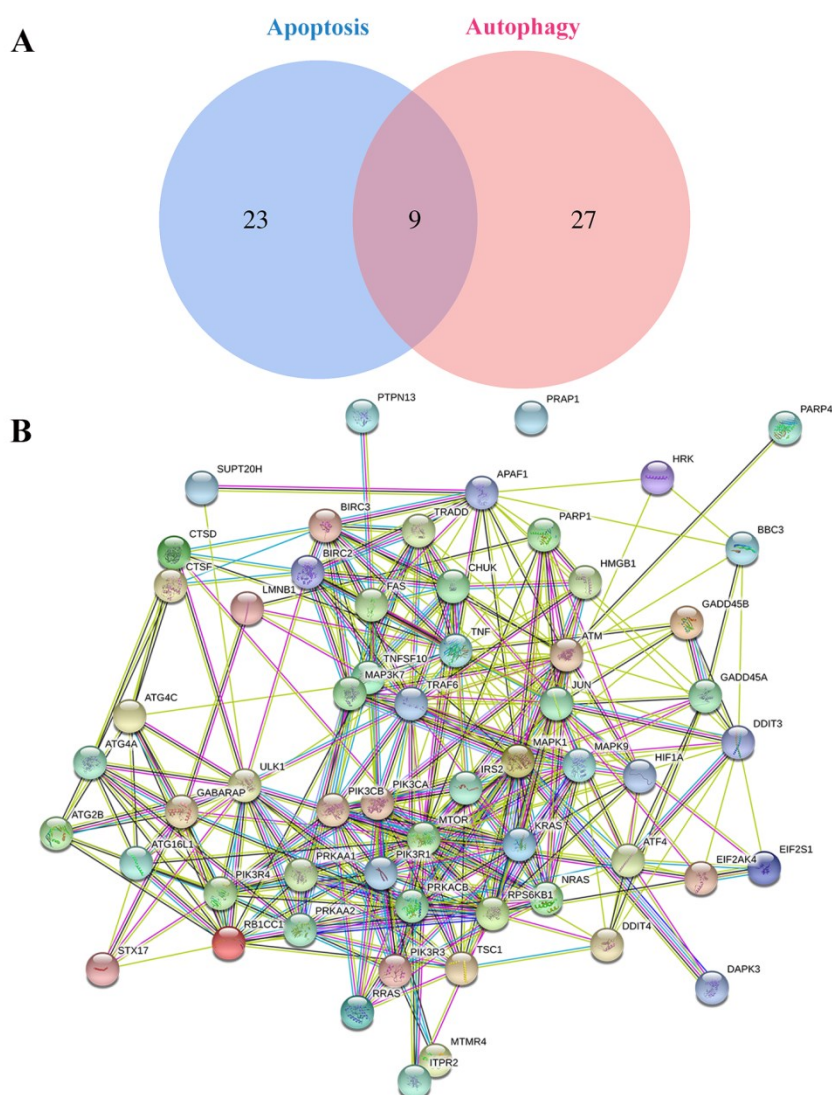

Supplement: d0fo02265a1.pdf [file d0fo02265a1.pdf]
